# Supplementary material
Source: MDPI journal article supplement (https://www.mdpi.com/2073-4441/15/22/3951)
Supplement: s1 [file s1]

## Supplementary Materials

# Accumulation and Origin of Phosphorus and Heavy Metals in Citrus Orchard Soils in Jeju Island, South Korea: Potential Ecological Risks and Bioavailability

Tae-Woo Kang <sup>1,\*†</sup>, Hae Jong Yang <sup>1,†</sup>, Won-Seok Lee <sup>1</sup>, Bon-Jun Koo <sup>2</sup> and Won-Pyo Park <sup>3,\*</sup>

<sup>1</sup> Yeongsan River Environment Research Center, National Institute of Environmental Research, Gwangju 61011, Republic of Korea

<sup>2</sup> Department of Biological Sciences, California Baptist University, Riverside, CA 92504-3297, USA

<sup>3</sup> Plant Resources and Environment Major, Faculty of Bioscience and Industry, College of Applied Life Science, Jeju National University, Jeju 63243, Republic of Korea

\* Correspondence: kangtw@korea.kr (T.-W.K.); oneticket@jejunu.ac.kr (W.-P.P.); Tel.: +82-62-970-3990 (T.-W.K.); +82-64-754-3317 (W.-P.P.)

† These authors contributed equally to this work.

## 1. Physicochemical analysis

Among soil physicochemical properties, soil pH (H<sub>2</sub>O), soil organic matter (SOM), and cation exchange capacity (CEC) were analyzed with 1:5 ratio, Walkley-Black wet digestion method and 1 M ammonium acetate (pH 7.0) extraction (Kjeldahl method), according to the Methods of Soil Chemical Analysis suggested by the National Institute of Agricultural Science of Rural Development Administration, Republic of Korea [1]. Soil pH (NaF), phosphorus retention capacity (P<sub>RC</sub>), and selective extraction were analyzed following the Soil Survey Laboratory Method Manual [2]. Soil pH (H<sub>2</sub>O, NaF) was measured using a pH meter (Orion star A211, Thermo Scientific, USA); phosphorus of P<sub>RC</sub> was measured using a UV/Vis spectrometer (Lambda 25, PerkinElmer, USA); and selective extraction (Al, Fe) were measured using an inductively coupled plasma optical emission spectrometer (JY138 Ultrace, Jobin Yvon, France).

**Table S1.** Summary of physicochemical properties in the topsoil and subsoil samples collected from citrus orchard and forestland sites in Jeju Island, South Korea

| Site           |         |      | pH               |      | SOM <sup>a</sup> | CEC <sup>b</sup> | P <sub>RC</sub> <sup>c</sup> | Al <sub>o</sub> +1/2Fe <sub>o</sub> |
|----------------|---------|------|------------------|------|------------------|------------------|------------------------------|-------------------------------------|
|                |         |      | H <sub>2</sub> O | NaF  | (g/kg)           | (cmolc/kg)       | (%)                          | (%)                                 |
| Citrus orchard | Topsoil | Mean | 5.02             | 9.31 | 96.3             | 6.55             | 69.4                         | 3.18                                |
|                |         | SD   | 0.65             | 0.56 | 43.8             | 0.18             | 20.8                         | 1.13                                |
|                |         | Max  | 6.68             | 10.2 | 185              | 6.95             | 95.4                         | 4.85                                |
|                |         | Min  | 4.04             | 8.28 | 20.7             | 6.18             | 25.6                         | 0.92                                |
|                | Subsoil | Mean | 4.84             | 9.75 | 83.3             | 6.55             | 80.9                         | 3.75                                |
|                |         | SD   | 0.66             | 0.95 | 46.1             | 0.19             | 19.8                         | 1.60                                |
|                |         | Max  | 6.54             | 11.2 | 197              | 6.85             | 99.3                         | 7.36                                |
|                |         | Min  | 4.02             | 7.94 | 11.9             | 6.19             | 30.1                         | 0.95                                |
| Forestland     | Topsoil | Mean | 4.73             | 10.2 | 182              | 6.53             | 95.0                         | 3.96                                |
|                |         | SD   | 0.26             | 0.7  | 31.3             | 0.14             | 4.0                          | 0.98                                |
|                |         | Max  | 5.08             | 11.2 | 219              | 6.85             | 98.6                         | 5.50                                |
|                |         | Min  | 4.23             | 8.84 | 124              | 6.38             | 86.2                         | 2.93                                |
|                | Subsoil | Mean | 4.83             | 10.9 | 154              | 6.61             | 99.4                         | 5.46                                |
|                |         | SD   | 0.20             | 0.5  | 41.7             | 0.21             | 0.9                          | 1.90                                |
|                |         | Max  | 5.14             | 11.5 | 204              | 6.97             | 100.0                        | 8.90                                |
|                |         | Min  | 4.37             | 9.93 | 79.4             | 6.39             | 97.5                         | 3.31                                |

<sup>a</sup> Soil organic matter, <sup>b</sup> Cation exchange capacity, <sup>c</sup> Phosphorus retention capacity.

**Table S2.** Concentration of total phosphorus (TP) and heavy metals in the topsoil and subsoil collected from citrus orchard and forestland sites in Jeju Island, South Korea

| Site                 | TP (%) |      |     | Pb (mg/kg) |      |     | Zn (mg/kg) |       |     | Cu (mg/kg) |       |     | Cd (mg/kg) |     |     | Cr (mg/kg) |       |     | Ni (mg/kg) |       |     | Al (%) |      |     |
|----------------------|--------|------|-----|------------|------|-----|------------|-------|-----|------------|-------|-----|------------|-----|-----|------------|-------|-----|------------|-------|-----|--------|------|-----|
|                      | A      | B    | C   | A          | B    | C   | A          | B     | C   | A          | B     | C   | A          | B   | C   | A          | B     | C   | A          | B     | C   | A      | B    | C   |
| Citrus orchard soils |        |      |     |            |      |     |            |       |     |            |       |     |            |     |     |            |       |     |            |       |     |        |      |     |
| 1                    | 1.14   | 0.19 | 6.2 | 23.9       | 19.2 | 1.2 | 269.3      | 117.8 | 2.3 | 145.9      | 50.8  | 2.9 | 1.3        | 0.8 | 1.6 | 144.4      | 97.5  | 1.5 | 62.2       | 80.4  | 0.8 | 4.70   | 5.36 | 0.9 |
| 2                    | 0.77   | 0.08 | 9.4 | 24.4       | 17.6 | 1.4 | 144.9      | 143.4 | 1.0 | 116.8      | 41.8  | 2.8 | 1.0        | 0.8 | 1.3 | 127.3      | 95.0  | 1.3 | 71.9       | 82.5  | 0.9 | 6.40   | 7.58 | 0.8 |
| 3                    | 0.31   | 0.12 | 2.6 | 18.6       | 15.1 | 1.2 | 145.7      | 118.9 | 1.2 | 54.5       | 42.2  | 1.3 | 0.8        | 0.8 | 1.0 | 129.0      | 119.3 | 1.1 | 101.8      | 105.9 | 1.0 | 6.48   | 6.75 | 1.0 |
| 4                    | 0.24   | 0.05 | 4.7 | 20.2       | 14.2 | 1.4 | 135.9      | 116.0 | 1.2 | 84.9       | 54.8  | 1.5 | 0.9        | 0.9 | 1.0 | 165.3      | 155.4 | 1.1 | 155.8      | 158.8 | 1.0 | 7.00   | 6.62 | 1.1 |
| 5                    | 0.55   | 0.22 | 2.5 | 20.0       | 12.4 | 1.6 | 142.5      | 141.1 | 1.0 | 111.1      | 60.0  | 1.9 | 0.9        | 1.0 | 0.9 | 244.9      | 149.8 | 1.6 | 75.9       | 96.0  | 0.8 | 6.04   | 8.32 | 0.7 |
| 6                    | 0.64   | 0.21 | 3.0 | 23.6       | 21.8 | 1.1 | 182.5      | 149.7 | 1.2 | 106.9      | 54.8  | 2.0 | 1.2        | 1.0 | 1.2 | 127.3      | 118.5 | 1.1 | 85.3       | 100.1 | 0.9 | 6.49   | 7.43 | 0.9 |
| 7                    | 0.14   | 0.07 | 2.0 | 15.1       | 12.7 | 1.2 | 97.2       | 68.0  | 1.4 | 47.9       | 25.3  | 1.9 | 0.5        | 0.4 | 1.3 | 72.6       | 59.9  | 1.2 | 40.5       | 36.5  | 1.1 | 2.97   | 2.89 | 1.0 |
| 8                    | 0.38   | 0.14 | 2.7 | 14.5       | 13.8 | 1.1 | 92.0       | 79.0  | 1.2 | 35.2       | 30.2  | 1.2 | 0.7        | 0.6 | 1.2 | 86.8       | 76.3  | 1.1 | 56.6       | 59.2  | 1.0 | 3.77   | 4.29 | 0.9 |
| 9                    | 0.40   | 0.15 | 2.6 | 35.0       | 17.1 | 2.0 | 192.6      | 127.2 | 1.5 | 173.7      | 85.2  | 2.0 | 1.3        | 1.0 | 1.3 | 184.4      | 122.3 | 1.5 | 71.6       | 81.0  | 0.9 | 5.92   | 6.81 | 0.9 |
| 10                   | 1.36   | 0.97 | 1.4 | 37.0       | 27.6 | 1.3 | 255.3      | 176.9 | 1.4 | 246.7      | 109.6 | 2.3 | 1.1        | 0.8 | 1.4 | 240.7      | 90.7  | 2.7 | 59.5       | 47.0  | 1.3 | 4.79   | 5.85 | 0.8 |
| 11                   | 0.39   | 0.23 | 1.7 | 14.9       | 12.4 | 1.2 | 147.1      | 138.5 | 1.1 | 111.4      | 61.9  | 1.8 | 0.9        | 0.8 | 1.1 | 102.3      | 70.1  | 1.5 | 37.7       | 38.9  | 1.0 | 5.86   | 6.44 | 0.9 |
| 12                   | 0.27   | 0.09 | 3.0 | 19.4       | 17.8 | 1.1 | 153.0      | 110.4 | 1.4 | 95.0       | 45.8  | 2.1 | 0.7        | 0.9 | 0.8 | 150.6      | 102.4 | 1.5 | 87.0       | 79.7  | 1.1 | 5.85   | 6.08 | 1.0 |
| 13                   | 0.83   | 0.28 | 2.9 | 16.9       | 16.5 | 1.0 | 113.7      | 98.2  | 1.2 | 83.8       | 53.6  | 1.6 | 0.9        | 0.6 | 1.5 | 92.1       | 65.0  | 1.4 | 57.4       | 54.3  | 1.1 | 6.26   | 4.96 | 1.3 |
| 14                   | 0.31   | 0.24 | 1.3 | 22.6       | 16.7 | 1.4 | 212.9      | 136.9 | 1.6 | 168.6      | 82.9  | 2.0 | 1.1        | 0.9 | 1.2 | 112.1      | 103.0 | 1.1 | 72.3       | 83.9  | 0.9 | 6.05   | 4.48 | 1.4 |
| 15                   | 0.34   | 0.10 | 3.3 | 26.7       | 19.3 | 1.4 | 189.6      | 114.5 | 1.7 | 173.8      | 72.1  | 2.4 | 1.0        | 1.0 | 1.0 | 237.0      | 114.9 | 2.1 | 71.8       | 69.0  | 1.0 | 5.40   | 5.56 | 1.0 |
| 16                   | 0.50   | 0.18 | 2.8 | 23.6       | 15.7 | 1.5 | 184.2      | 97.6  | 1.9 | 67.5       | 49.6  | 1.4 | 1.2        | 0.8 | 1.5 | 141.4      | 103.4 | 1.4 | 79.4       | 90.5  | 0.9 | 4.91   | 6.23 | 0.8 |
| 17                   | 0.76   | 0.34 | 2.2 | 22.4       | 17.2 | 1.3 | 250.5      | 135.7 | 1.8 | 130.5      | 75.5  | 1.7 | 1.2        | 0.7 | 1.7 | 147.4      | 106.9 | 1.4 | 120.1      | 106.2 | 1.1 | 5.70   | 5.35 | 1.1 |
| 18                   | 0.21   | 0.14 | 1.5 | 12.5       | 12.1 | 1.0 | 147.0      | 135.7 | 1.1 | 38.3       | 22.9  | 1.7 | 0.8        | 0.9 | 0.9 | 37.4       | 35.8  | 1.0 | 23.1       | 23.6  | 1.0 | 3.41   | 3.73 | 0.9 |
| 19                   | 0.33   | 0.18 | 1.8 | 20.2       | 13.4 | 1.5 | 163.6      | 128.0 | 1.3 | 48.6       | 33.7  | 1.4 | 0.7        | 0.7 | 1.0 | 50.1       | 44.9  | 1.1 | 32.2       | 31.3  | 1.0 | 3.70   | 3.42 | 1.1 |
| 20                   | 0.96   | 0.40 | 2.4 | 21.4       | 13.9 | 1.5 | 192.2      | 106.6 | 1.8 | 76.4       | 40.5  | 1.9 | 1.0        | 0.9 | 1.1 | 147.2      | 141.3 | 1.0 | 71.5       | 78.5  | 0.9 | 3.85   | 4.73 | 0.8 |
| 21                   | 0.24   | 0.19 | 1.3 | 15.5       | 16.4 | 0.9 | 119.6      | 117.2 | 1.0 | 52.1       | 44.6  | 1.2 | 0.7        | 0.8 | 0.9 | 109.4      | 106.8 | 1.0 | 65.5       | 70.7  | 0.9 | 4.08   | 4.08 | 1.0 |
| 22                   | 0.44   | 0.45 | 1.0 | 23.7       | 19.7 | 1.2 | 193.3      | 181.9 | 1.1 | 64.0       | 60.2  | 1.1 | 1.1        | 1.0 | 1.1 | 130.6      | 128.2 | 1.0 | 97.0       | 101.6 | 1.0 | 5.58   | 5.04 | 1.1 |
| 23                   | 0.37   | 0.18 | 2.1 | 16.3       | 9.8  | 1.7 | 144.7      | 114.3 | 1.3 | 109.9      | 62.4  | 1.8 | 0.9        | 0.6 | 1.5 | 73.9       | 70.7  | 1.0 | 59.1       | 55.2  | 1.1 | 4.58   | 5.29 | 0.9 |
| 24                   | 0.25   | 0.08 | 3.1 | 18.0       | 17.0 | 1.1 | 114.4      | 88.1  | 1.3 | 52.5       | 38.9  | 1.3 | 0.7        | 0.7 | 1.0 | 91.1       | 86.8  | 1.0 | 82.5       | 76.6  | 1.1 | 4.62   | 4.85 | 1.0 |
| 25                   | 0.22   | 0.11 | 2.0 | 29.2       | 17.0 | 1.7 | 112.6      | 93.0  | 1.2 | 50.8       | 36.0  | 1.4 | 0.9        | 0.5 | 1.8 | 102.1      | 78.9  | 1.3 | 50.3       | 52.8  | 1.0 | 4.36   | 5.17 | 0.8 |
| 26                   | 0.39   | 0.19 | 2.0 | 14.6       | 7.9  | 1.8 | 136.6      | 97.6  | 1.4 | 60.3       | 48.8  | 1.2 | 1.0        | 0.6 | 1.7 | 89.2       | 71.1  | 1.3 | 53.2       | 44.9  | 1.2 | 4.96   | 5.89 | 0.8 |
| 27                   | 1.23   | 0.68 | 1.8 | 35.6       | 14.3 | 2.5 | 191.0      | 159.1 | 1.2 | 108.7      | 63.5  | 1.7 | 1.7        | 1.0 | 1.7 | 161.2      | 94.8  | 1.7 | 58.8       | 52.6  | 1.1 | 3.64   | 4.19 | 0.9 |
| 28                   | 0.33   | 0.35 | 1.0 | 14.0       | 4.9  | 2.9 | 144.7      | 89.0  | 1.6 | 73.1       | 57.2  | 1.3 | 0.9        | 0.9 | 1.0 | 79.5       | 58.0  | 1.4 | 55.0       | 43.5  | 1.3 | 4.15   | 6.84 | 0.6 |
| 29                   | 0.24   | 0.09 | 2.6 | 18.3       | 14.1 | 1.3 | 103.7      | 93.7  | 1.1 | 40.8       | 33.5  | 1.2 | 0.8        | 0.7 | 1.1 | 89.0       | 82.7  | 1.1 | 70.5       | 74.2  | 1.0 | 5.52   | 5.72 | 1.0 |

|                  |      |      |            |      |      |            |       |       |            |       |       |            |     |     |            |       |       |            |       |       |            |      |      |            |
|------------------|------|------|------------|------|------|------------|-------|-------|------------|-------|-------|------------|-----|-----|------------|-------|-------|------------|-------|-------|------------|------|------|------------|
| 30               | 0.21 | 0.09 | <b>2.4</b> | 21.8 | 17.8 | <b>1.2</b> | 129.9 | 92.7  | <b>1.4</b> | 48.7  | 27.5  | <b>1.8</b> | 0.8 | 0.6 | <b>1.3</b> | 80.0  | 70.5  | <b>1.1</b> | 53.2  | 40.9  | <b>1.3</b> | 5.53 | 5.70 | <b>1.0</b> |
| 31               | 1.65 | 1.27 | <b>1.3</b> | 39.8 | 31.2 | <b>1.3</b> | 192.0 | 159.4 | <b>1.2</b> | 106.4 | 87.9  | <b>1.2</b> | 1.5 | 1.1 | <b>1.4</b> | 171.1 | 149.9 | <b>1.1</b> | 105.4 | 97.5  | <b>1.1</b> | 6.15 | 6.68 | <b>0.9</b> |
| 32               | 0.29 | 0.21 | <b>1.4</b> | 17.2 | 16.2 | <b>1.1</b> | 173.5 | 97.4  | <b>1.8</b> | 108.8 | 60.1  | <b>1.8</b> | 0.8 | 0.6 | <b>1.3</b> | 86.9  | 90.0  | <b>1.0</b> | 69.5  | 70.1  | <b>1.0</b> | 5.96 | 5.30 | <b>1.1</b> |
| 33               | 0.56 | 0.21 | <b>2.7</b> | 22.7 | 24.1 | <b>0.9</b> | 110.5 | 98.0  | <b>1.1</b> | 71.6  | 41.8  | <b>1.7</b> | 0.7 | 0.4 | <b>1.8</b> | 103.1 | 85.1  | <b>1.2</b> | 66.9  | 66.4  | <b>1.0</b> | 4.98 | 5.46 | <b>0.9</b> |
| 34               | 0.18 | 0.13 | <b>1.4</b> | 27.2 | 33.2 | <b>0.8</b> | 128.7 | 93.1  | <b>1.4</b> | 44.0  | 36.3  | <b>1.2</b> | 0.5 | 0.6 | <b>0.8</b> | 66.8  | 70.4  | <b>0.9</b> | 54.7  | 57.9  | <b>0.9</b> | 6.15 | 4.48 | <b>1.4</b> |
| 35               | 0.45 | 0.23 | <b>2.0</b> | 15.7 | 14.7 | <b>1.1</b> | 153.7 | 118.8 | <b>1.3</b> | 58.8  | 43.7  | <b>1.3</b> | 0.6 | 0.5 | <b>1.2</b> | 82.1  | 87.9  | <b>0.9</b> | 58.5  | 74.2  | <b>0.8</b> | 4.16 | 5.07 | <b>0.8</b> |
| Mean             | 0.51 | 0.25 | <b>2.5</b> | 21.8 | 16.7 | <b>1.4</b> | 158.9 | 118.1 | <b>1.4</b> | 90.5  | 52.4  | <b>1.7</b> | 0.9 | 0.8 | <b>1.2</b> | 121.6 | 94.4  | <b>1.3</b> | 69.5  | 70.9  | <b>1.0</b> | 5.14 | 5.50 | <b>0.9</b> |
| SD               | 0.37 | 0.25 | <b>1.6</b> | 6.9  | 5.7  | <b>0.4</b> | 44.1  | 27.2  | <b>0.3</b> | 47.8  | 19.4  | <b>0.4</b> | 0.3 | 0.2 | <b>0.3</b> | 51.0  | 29.3  | <b>0.3</b> | 25.2  | 27.0  | <b>0.1</b> | 1.04 | 1.20 | <b>0.2</b> |
| Max              | 1.65 | 1.27 | <b>9.4</b> | 39.8 | 33.2 | <b>1.2</b> | 269.3 | 181.9 | <b>1.5</b> | 246.7 | 109.6 | <b>2.3</b> | 1.7 | 1.1 | <b>1.5</b> | 244.9 | 155.4 | <b>1.6</b> | 155.8 | 158.8 | <b>1.0</b> | 7.00 | 8.32 | <b>0.8</b> |
| Min              | 0.14 | 0.05 | <b>1.0</b> | 12.5 | 4.9  | <b>2.6</b> | 92.0  | 68.0  | <b>1.4</b> | 35.2  | 22.9  | <b>1.5</b> | 0.5 | 0.4 | <b>1.3</b> | 37.4  | 35.8  | <b>1.0</b> | 23.1  | 23.6  | <b>1.0</b> | 2.97 | 2.89 | <b>1.0</b> |
| Forestland soils |      |      |            |      |      |            |       |       |            |       |       |            |     |     |            |       |       |            |       |       |            |      |      |            |
| 1                | 0.08 | 0.06 | <b>1.3</b> | 27.9 | 20.6 | <b>1.4</b> | 102.9 | 95.8  | <b>1.1</b> | 25.1  | 24.6  | <b>1.0</b> | 1.0 | 0.6 | <b>1.7</b> | 48.3  | 55.2  | <b>0.9</b> | 29.9  | 34.7  | <b>0.9</b> | 5.24 | 6.09 | <b>0.9</b> |
| 2                | 0.10 | 0.13 | <b>0.8</b> | 28.4 | 22.1 | <b>1.3</b> | 105.2 | 102.5 | <b>1.0</b> | 26.4  | 23.7  | <b>1.1</b> | 1.0 | 0.9 | <b>1.1</b> | 33.4  | 33.7  | <b>1.0</b> | 21.2  | 22.2  | <b>1.0</b> | 5.64 | 6.25 | <b>0.9</b> |
| 3                | 0.15 | 0.11 | <b>1.3</b> | 39.9 | 20.1 | <b>2.0</b> | 109.7 | 97.8  | <b>1.1</b> | 42.6  | 38.1  | <b>1.1</b> | 1.2 | 0.9 | <b>1.3</b> | 85.0  | 127.3 | <b>0.7</b> | 49.9  | 61.6  | <b>0.8</b> | 4.58 | 5.27 | <b>0.9</b> |
| 4                | 0.10 | 0.06 | <b>1.8</b> | 25.2 | 25.3 | <b>1.0</b> | 98.0  | 105.6 | <b>0.9</b> | 20.5  | 23.6  | <b>0.9</b> | 0.8 | 0.6 | <b>1.3</b> | 40.6  | 43.5  | <b>0.9</b> | 20.4  | 22.8  | <b>0.9</b> | 3.70 | 5.36 | <b>0.7</b> |
| 5                | 0.06 | 0.06 | <b>1.0</b> | 22.1 | 16.9 | <b>1.3</b> | 89.8  | 99.2  | <b>0.9</b> | 31.0  | 37.3  | <b>0.8</b> | 0.7 | 0.7 | <b>1.0</b> | 91.6  | 108.6 | <b>0.8</b> | 52.0  | 83.2  | <b>0.6</b> | 5.49 | 7.02 | <b>0.8</b> |
| 6                | 0.13 | 0.09 | <b>1.4</b> | 38.8 | 16.2 | <b>2.4</b> | 100.1 | 87.6  | <b>1.1</b> | 32.8  | 30.0  | <b>1.1</b> | 1.0 | 0.8 | <b>1.3</b> | 64.6  | 70.5  | <b>0.9</b> | 34.0  | 43.7  | <b>0.8</b> | 4.13 | 5.18 | <b>0.8</b> |
| 7                | 0.15 | 0.09 | <b>1.6</b> | 17.5 | 12.2 | <b>1.4</b> | 97.0  | 93.2  | <b>1.0</b> | 34.0  | 30.7  | <b>1.1</b> | 1.0 | 1.0 | <b>1.0</b> | 77.9  | 82.5  | <b>0.9</b> | 35.3  | 36.7  | <b>1.0</b> | 5.62 | 4.85 | <b>1.2</b> |
| 8                | 0.12 | 0.11 | <b>1.1</b> | 45.2 | 19.9 | <b>2.3</b> | 99.8  | 99.6  | <b>1.0</b> | 23.4  | 23.1  | <b>1.0</b> | 1.2 | 0.7 | <b>1.7</b> | 35.1  | 31.7  | <b>1.1</b> | 17.8  | 18.1  | <b>1.0</b> | 3.71 | 6.35 | <b>0.6</b> |
| 9                | 0.07 | 0.07 | <b>1.0</b> | 38.3 | 12.3 | <b>3.1</b> | 70.5  | 66.7  | <b>1.1</b> | 25.1  | 90.7  | <b>0.3</b> | 0.8 | 0.7 | <b>1.1</b> | 84.8  | 89.9  | <b>0.9</b> | 23.7  | 40.8  | <b>0.6</b> | 5.68 | 7.15 | <b>0.8</b> |
| 10               | 0.08 | 0.09 | <b>0.8</b> | 13.9 | 13.2 | <b>1.1</b> | 68.0  | 74.0  | <b>0.9</b> | 31.5  | 38.3  | <b>0.8</b> | 0.8 | 0.7 | <b>1.1</b> | 83.5  | 86.9  | <b>1.0</b> | 39.4  | 54.3  | <b>0.7</b> | 5.26 | 5.92 | <b>0.9</b> |
| Mean             | 0.10 | 0.09 | <b>1.2</b> | 29.7 | 17.9 | <b>1.7</b> | 94.1  | 92.2  | <b>1.0</b> | 29.2  | 36.0  | <b>0.9</b> | 1.0 | 0.8 | <b>1.3</b> | 64.5  | 73.0  | <b>0.9</b> | 32.4  | 41.8  | <b>0.8</b> | 4.90 | 5.94 | <b>0.8</b> |
| SD               | 0.03 | 0.03 | <b>0.3</b> | 10.4 | 4.5  | <b>0.7</b> | 14.1  | 12.6  | <b>0.1</b> | 6.5   | 20.2  | <b>0.3</b> | 0.2 | 0.1 | <b>0.3</b> | 23.0  | 32.0  | <b>0.1</b> | 12.1  | 20.1  | <b>0.1</b> | 0.81 | 0.78 | <b>0.2</b> |
| Max              | 0.15 | 0.13 | <b>1.8</b> | 45.2 | 25.3 | <b>1.8</b> | 109.7 | 105.6 | <b>1.0</b> | 42.6  | 90.7  | <b>0.5</b> | 1.2 | 1.0 | <b>1.2</b> | 91.6  | 127.3 | <b>0.7</b> | 52.0  | 83.2  | <b>0.6</b> | 5.68 | 7.15 | <b>0.8</b> |
| Min              | 0.06 | 0.06 | <b>0.8</b> | 13.9 | 12.2 | <b>1.1</b> | 68.0  | 66.7  | <b>1.0</b> | 20.5  | 23.1  | <b>0.9</b> | 0.7 | 0.6 | <b>1.2</b> | 33.4  | 31.7  | <b>1.1</b> | 17.8  | 18.1  | <b>1.0</b> | 3.70 | 4.85 | <b>0.8</b> |

A: Topsoil, B: Subsoil, C: Topsoil/Subsoil ratio (bold).

**Table S3.** Principal component analysis (PCA) results of phosphorus and heavy metals in the topsoil collected from citrus orchard sites in Jeju Island, South Korea

| Component               | PC 1         | PC 2         |
|-------------------------|--------------|--------------|
| Cd                      | <b>0.848</b> | 0.119        |
| TP                      | <b>0.841</b> | -0.045       |
| Zn                      | <b>0.833</b> | 0.091        |
| Pb                      | <b>0.793</b> | 0.164        |
| Cu                      | <b>0.787</b> | 0.226        |
| Cr                      | <b>0.695</b> | 0.465        |
| Al                      | 0.065        | <b>0.891</b> |
| Ni                      | 0.153        | <b>0.866</b> |
| Total variance (%)      | 53.3         | 18.5         |
| Cumulative variance (%) | 53.3         | 71.8         |

Extraction method: Principal component analysis

Rotation method: Varimax with Kaiser Normalization

(PC1–principal component 1, PC2–principal component 2)

## References

1. NAAS (National Institute Academy of Agricultural Science). *Methods of Soil Chemical Analysis*. Rural Development Administration, Wanjju, Korea. 2010. (in Korean).
2. Burt, R. *Soil Survey Laboratory Methods Manual*. Soil Survey Investigations Report No. 42, Ver. 4.0, US Department of Agriculture, Natural Resource Conservation Service, Washington, DC, USA, 2004.
